# Supplementary material
Source: publisher figshare collection journal article supplement (https://sage.figshare.com/ndownloader/files/15312449)
Supplement: Supplementary file 1 [file 15312449]

Table 1 Thought diary

| What was going on? | What was the thought that popped into your head?<br><br>These are your <b>“hot thoughts”</b> . | How did this make you feel?<br>How bad did you feel (0 – 10)? | Any bodily changes you noticed? | What did you do?<br>What happened after that? | What could you think next time you are in a situation like this? List all the possible <b>“cool coping thoughts”</b> , even if you only slightly believe them. | If you believed this coping thought, what would your new feeling be? (It might only be slightly different) |
|--------------------|------------------------------------------------------------------------------------------------|---------------------------------------------------------------|---------------------------------|-----------------------------------------------|----------------------------------------------------------------------------------------------------------------------------------------------------------------|------------------------------------------------------------------------------------------------------------|
|                    |                                                                                                |                                                               |                                 |                                               |                                                                                                                                                                |                                                                                                            |
